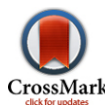

## Correction

# Correction: The Effect of Paternal Age on Offspring Intelligence and Personality when Controlling for Paternal Trait Level

The *PLOS ONE* Staff

## Notice of Republication

This article was republished on April 21, 2014 to correct errors in the title. The correct title is “The Effect of Paternal Age on Offspring Intelligence and Personality when Controlling for Parental Trait Levels.” Please download this article again to view the correct version. The originally published, uncorrected article and the republished, corrected article are provided here for reference.

## Supporting Information

**File S1.** Originally published, uncorrected article.  
(PDF)

**File S2.** Republished corrected article.  
(PDF)

## Reference

1. Arslan RC, Penke L, Johnson W, Iacono WG, McGue M (2014) The Effect of Paternal Age on Offspring Intelligence and Personality when Controlling for Paternal Trait Level. *PLoS ONE* 9(2): e90097. doi:10.1371/journal.pone.0090097

---

**Citation:** The *PLOS ONE* Staff (2014) Correction: The Effect of Paternal Age on Offspring Intelligence and Personality when Controlling for Paternal Trait Level. *PLoS ONE* 9(5): e97370. doi:10.1371/journal.pone.0097370

**Published** May 5, 2014

**Copyright:** © 2014 The *PLOS ONE* Staff. This is an open-access article distributed under the terms of the Creative Commons Attribution License, which permits unrestricted use, distribution, and reproduction in any medium, provided the original author and source are credited.
